# Supplementary material
Source: publisher site journal article supplement (https://www.dovepress.com/article/499597)
Supplement: Supplementary file 1 [file get_supplementary_file.php]

**SUPPLEMENTARY MATERIALS**

**Table of contents**

**Supplementary methods**

1. CT and MRI imaging acquisition protocols.
2. Locoregional and systemic therapy.
3. Pathologic evaluation.
4. Development and validation a prediction system.

**Supplementary results**

1. Consistency between RECIST 1.1 and mRECIST, and interobserver agreement.
2. Predictors of recurrence-free survival and overall survival after liver resection.
3. The prediction system for major pathologic response.
4. Prognosis stratification ability of the prediction system.
5. Subgroup analyses.

**1. CT and MRI imaging acquisition protocols.**

***1.1 CT imaging acquisition protocols***

All contrast-enhanced dual-phase CT scans of the chest, abdomen, and pelvis were performed on a 64-section multidetector CT scanner.

Multiphasic contrast-enhanced CT was performed using 16-detector CT scanner (Philips Brilliance-16, Philips Medical Systems, The Netherland), 64-detector scanner (Philips Brilliance-64, Philips Medical Systems, The Netherland), 64-detector scanner (SOMATOM Definition, Siemens Medical Systems, Erlangen, Germany), 64-detector scanner (SOMATOM Definition AS, Siemens Medical Systems, Erlangen, Germany) or 128-detector scanner (SOMATOM Definition Flash, Siemens Medical Systems, Erlangen, Germany). All patients received a nonionic contrast medium (Iopamidol, 370 mg of iodine per milliliter [Iopamidol 370; Bracco Imaging, Milan, Italy] or Iodixanol, 320 mg of iodine per milliliter [GE Healthcare Ireland, U.S]) at a dose of 1.4 mL (518 mg of iodine) per kilogram. Contrast medium was intravenously administered at a rate of 2-2.5 ml/s through an 18-gauge intravenous catheter inserted into an antecubital vein.

After obtaining an anteroposterior digital scout radiograph, patients were scanned craniocaudally from the dome of the liver to the iliac crest before and after intravenous contrast medium administration. Images were obtained during the arterial phase (25-40s after contrast medium injection) and portal venous phase (70-80s after injection).

**Table S1.** Imaging Parameters of Contrast-enhanced Multiphasic CT.

| **Parameters** | **Detector configuration** | **Tube voltage (kV)** | **Tube current (mA)** | **Rotation period (s)** | **Detector collimation (mm)** | **Helical pitch** | **Acquisition time (s)** | **Section thickness (mm)** | **Intersection gap** | **Reconstruction kernel** | **Volumetric CT dose (mGy)** |
| --- | --- | --- | --- | --- | --- | --- | --- | --- | --- | --- | --- |
| **Philips Brilliance-16** | | | | | | | | | | | |
| Pre-contrast phase | 16 | 120 | 250 | 1.0 | 75.0 | 0.875 | 8-12 | 7 | 0 | Soft tissue | 9.73 |
| Post-contrast phases | 16 | 120 | 250 | 1.0 | 75.0 | 0.875 | 8-12 | 7 | 0 | Soft tissue | 9.736 |
| **Philips Brilliance-64** | | | | | | | | | | | |
| Pre-contrast phase | 64 | 120 | 260-320 | 0.7 | 75.0 | 0.625 | 6-8 | 5 | 0 | Soft tissue | 13.3 |
| Post-contrast phases | 64 | 120 | 260-320 | 0.7 | 75.0 | 0.625 | 6-8 | 5 | 0 | Soft tissue | 13.3 |
| **OMATOM Definition CT** | | | | | | | | | | | |
| Pre-contrast phase | 64 | 120 | 210 | 1.0 | 75.0 | 0.65 | 6-8 | 5 | 0 | Soft tissue | 10.61 |
| Post-contrast phases | 64 | 120 | 210 | 1.0 | 75.0 | 0.65 | 6-8 | 5 | 0 | Soft tissue | 10.61 |
| **SOMATOM Definition AS** | | | | | | | | | | | |
| Pre-contrast phase | 64 | 120 | 420 | 0.5 | 76.8 | 0.6 | 4-8 | 5 | 0 | Soft tissue | 14.06 |
| Post-contrast phases | 64 | 120 | 420 | 0.5 | 76.8 | 0.6 | 4-8 | 2 | 0 | Soft tissue | 14.06 |
| **SOMATOM Definition Flash** | | | | | | | | | | | |
| Pre-contrast phase | 128 | 120 | 420 | 0.5 | 76.8 | 1 | 4-8 | 5 | 0 | Soft tissue | 14.17 |
| Post-contrast phases | 128 | 120 | 420 | 0.5 | 76.8 | 1 | 4-8 | 2 | 0 | Soft tissue | 14.17 |

***1.2 MRI imaging acquisition protocols.***

All enhanced MR images were acquired on one of the following eight types of 3.0 T or 1.5 T systems (Siemens MAGNETOM Skyra; Siemens TrioTim; Siemens Avanto; GE SIGNA™ Architect; GE Discovery MR 750; GE SIGNA™ Premier; Philips Ingenia Elition X; uMR588). The MRI sequences included: (***a***) T2-weighted imaging; (***b***) diffusion-weighted imaging (b values: 0, 50, 500, 800, 1000, and 1200 s/mm2 [Siemens MAGNETOM Skyra]; 0, 50, 800 s/mm2 [Siemens TrioTim; Siemens Avanto]; 0, 50, 1000 s/mm2 [Siemens Avanto; GE SIGNA™ Architect; uMR588]; 0, 50, 1000 s/mm2 [GE SIGNA™ Architect; GE SIGNA™ Premier; uMR588]; 0, 200, 800, and 1000 s/mm2 [GE Discovery MR 750]; 0, 200, 1000 s/mm2 [Philips Ingenia Elition X]) with apparent diffusion coefficient maps reconstructed using the monoexponential model; (***c***) in- and opposed-phase T1-weighted imaging. For extracellular contrast agent (ECA)-enhanced MR images, dynamic T1-weighted imaging before and after injection of contrast agent in the late arterial phase, portal venous phase (60s after start of contrast media injection), and delayed phase (180s after injection) were obtained. 0.1 mmol/kg of gadopentetate dimeglumine (Magnevist®; Bayer Schering Pharma AG, Berlin, Germany) or gadoterate meglumine (Dotarem®; Guerbet, Paris, France) or gadobenate dimeglumine (MultiHance®; Bracco, Shanghai, China) was injected at a rate of 2.5 ml/s. For gadoxetate disodium (EOB)-enhanced MR images, dynamic T1-weighted imaging before and after injection of EOB in the late arterial phase, portal venous phase (60s after injection), transitional phase (180s after injection), and hepatobiliary phase (20min after injection) were obtained. 0.025 mmol/kg of EOB (Primovist®; Bayer Schering Pharma AG, Berlin, Germany) was injected at a rate of 1.0-2.0 ml/s, with an immediately followed 20-30 ml saline ﬂush. The arterial phase images were achieved either with acquisition triggered 7s after arrival of the contrast bolus in the celiac trunk or a multiple arterial phase (MAP) imaging techniques.

**2. Locoregional and systemic therapy.**

***2.1 Locoregional therapy***

For patients undergoing liver resection, preoperative TACE was performed because of the presence of multiple tumors, large tumors, proximity to major vascular structures, or insufficient estimated remnant liver volume after resection. For patients enlisted for liver transplantation whose waitlist time exceeded 6 months, TACE was performed to prevent tumor progression and drop-out.

TACE procedure was performed by two experienced interventional radiologists (IR), and a consistent approach was applied according to our standard institutional protocol. After accessing to the right femoral artery with an 18-gauge Seldinger needle, the celiac, hepatic, superior mesenteric artery was selectively catheterized, and digital subtraction angiography was used to assess the feeding vessels of intrahepatic tumors. The catheter was super-selectively placed into the feeding segmental or subsegmental arteries using selective hepatic angiography and/or tracking navigation imaging. Conventional TACE or drug-eluting-bead TACE was performed at the discretion of IRs. For conventional TACE, chemoembolization was performed using emulsion of 50-100mg fluorouracil and/or 20-50mg epirubicin mixed with iodized oil. Afterwards, embolic agent was injected to interrupt blood flow. Drug-eluting-bead TACE was performed using drug-eluting beads loaded with doxorubicin and a super-selective approach was applied. For patients with very large tumors or with insufficient liver preservation, split TACE was allowed with a 4-6 weeks interval. TACE procedure was repeated on demand every 6-8 weeks if follow-up images showed evident enhancing lesions.

***2.2 Systemic therapy***

In our tertiary hospital, treatment decision and administration of systemic therapy was determined in a multidisciplinary manner that included transplant and hepatobiliary surgeons, oncologists, gastroenterologists, radiologists and interventional radiologists, according to Good Practice Recommendations.

Three types of oral tyrosine kinase inhibitors (TKI) were used in this study, with lenvatinib (Eisai, Inc., Japan) as the most commonly used agents, followed by sorafenib (Bayer, USA) and donafenib (Zelgen Medicine Co. Ltd., China). Our study included patients from 2019, at a timepoint when lenvatinib was approved by the FDA and was recommended by guidelines as first-line therapy1-3. The high objective response made lenvatinib as the preferred TKI4. In addition, four types of immune checkpoint inhibitor (ICI) were applied in this study: camrelizumab (Hengrui Medicine, China), sintilimab (Innovent Biologics, China), tislelizumab (BeiGene Ltd., China) and pembrolizumab (MSD, USA).

After initiation of systemic therapy, patients were monitored routinely to evaluate clinical symptoms and tolerance. Complete blood count, liver, renal, thyroid, adrenal and cardiac function were monitored, and doses were adapted according to the type and severity of specific toxicities. Tumor biomarkers (AFP and PIVKA-Ⅱ) combined with radiologic examination (CE-CT or MRI) were performed every 2-3 months to evaluate treatment efficacy.

***2.3 Combination therapy***

Systemic combination therapy based on lenvatinib has been reported as a promising regimen for unresectable HCC owing to its high objective response reported in a phase 1b clinical trial (ORR: 46%)5 and subsequent observational studies6-8. In addition, the combination of TACE and lenvatinib may further increase the objective response rate and achieve higher downstaging/conversion rate for transplantation or resection9-11. The phase 2 TACTICS-L trial that enrolled 62 patients with unresectable HCC to undergo TACE plus lenvatinib, reported an ORR of 88.7% and a radiologic CR of 67.7%, which translated into prolonged progression-free survival (PFS, median: 28.0 months)12. In addition to the TACE plus TKI combinations, multiple retrospective and prospective studies reported encouraging results on the triple regimens for HCC (i.e., TACE plus TKI and ICI)13-16. The latest randomized trial EMERALD-1 (NCT 03778957) showed that the combination of TACE plus bevacizumab and durvalumab achieved markedly better PFS than TACE alone for unresectable HCC. These growing evidence provides the rational for the combination therapy and may enhance clinical confidence for use.

**Table S2.** Type of systemic therapy.

| **Systemic therapy** | **No. of patients** | **Dose/Cycle** |
| --- | --- | --- |
| **Tyrosine kinase inhibitor** | | |
| Lenvatinib | 90 (80.4%) | 8 mg/qd if bodyweight <60 kg;  12 mg/qd if bodyweight ≥60 kg |
| Sorafenib | 11 (9.8%) | 400 mg/bid |
| Donafenib | 11 (9.8%) | 200 mg/bid |
| **Immune checkpoint inhibitor** | | |
| No use | 24 (21.4%) | / |
| camrelizumab | 56 (50.0%) | 200 mg, every 2 or 3 weeks |
| sintilimab | 25 (22.3%) | 200 mg, every 2 or 3 weeks |
| pembrolizumab | 4 (3.6%) | 200 mg, every 2 or 3 weeks |
| tislelizumab | 3 (2.7%) | 200 mg, every 2 or 3 weeks |

**Table S3.** Number of patients receiving different combination therapy.

| **Combination regimen** | **No. of patients** |
| --- | --- |
| TACE plus lenvatinib | 14 (12.5%) |
| TACE plus sorafenib | 8 (7.1%) |
| TACE plus donafenib | 2 (1.8%) |
| TACE plus lenvatinib and camrelizumab | 51 (45.5%) |
| TACE plus lenvatinib and sintilimab | 20 (17.8%) |
| TACE plus lenvatinib and tislelizumab | 3 (2.7%) |
| TACE plus lenvatinib and pembrolizumab | 2 (1.8%) |
| TACE plus donafenib and sintilimab | 5 (4.5%) |
| TACE plus donafenib and camrelizumab | 2 (1.8%) |
| TACE plus donafenib and tislelizumab | 2 (1.8%) |
| TACE plus sorafenib and camrelizumab | 3 (2.7%) |

TACE transarterial chemoembolization

**3. Pathologic evaluation.**

For resected tumors or explanted liver, a standard sampling protocol was performed and the specimens were sectioned into 5 mm-thick slices in the axial plane and prepared with hematoxylin and eosin stains. In compliance with the institutional standard clinical protocol, two hepatopathologists (with 3-5 and over 20 years of experiences in liver pathology, respectively) who were aware of the clinical and imaging data reviewed all specimens in consensus. Macroscopic analysis was performed to evaluate the overall size and number of tumors, presence of macrovascular invasion and satellite tumors. Microscopic analysis was performed to evaluate tumor differentiation, capsule invasion, surgical margin, microvascular invasion and degree of liver fibrosis (assessed using either the Ishak or the Scheuer grading system).

At our institution, routine pathology reports for treated lesions contain information on the degree of residual viable tumors, in which the two-dimensional semiquantitative percentage of residual viable tumors estimated in comparison with the overall tumor area is described from 0% to 100%. From 0% to 95%, it is described in increments of five, and from 96% to 100%, it is described in increments of one. If no residual viable tumors were observed in the initially evaluated specimens, additional specimens were evaluated for confirmation. Additionally, if the pathologic results was inconsistent with radiologic findings, the possibility of sampling position misalignment was considered, and a re-evaluation of the gross specimen to build a better agreement between imaging and pathologic sample location in the gross specimen was performed.

**4. Development and validation of a prediction system.**

We aimed to develop a non-invasive prediction system for prediction of pathologic response and to validate it internally. Prior to data analysis, all potential variables were screened for missing values. Among them, AFP levels at baseline and before surgery were missing in 6 (5.4%) and 3 (2.7%) patients, PIVKA-Ⅱ levels at baseline and before surgery in 7 (6.3%) and 2 (1.8%), prothrombin time and international normalized ratio at baseline in 8 (7.1%). While the percentage of missing values for other variables did not exceed 5%. We assumed that these missing data could be considered at random, and thus performed multiple imputation with chained equations for replacement, using the R software *mice* package.

Uni- and multivariable Logistic regression analyses were conducted to examine the association between candidate variables and binary pathologic response (i.e., MPR or pCR) that showed higher prognostic value. Variables with a univariate p<0.1 or deemed to have clinical significance (repeatedly reported in previous studies) were entered into subsequent multivariable analysis. Pathologic parameters (e.g., microvascular invasion, tumor differentiation) were not considered because percutaneous biopsy is not routinely performed for HCC. The Youden index (sensitivity + specificity -1) was used to identify the optimal cutoff values of candidate predictors. In addition, the collinearity among the variables were evaluated with the variance inflation factor and correlation statistics before inclusion in multivariable analysis. The interaction terms between variables were assessed and interactions were included. The final model was fitted using multivariable Logistic regression analyses, and the coefficients estimated for each predictor were used as relative weights.

Performance of single predictor and the final model in predicting pathologic response was assessed with the areas under the receiver operating characteristic curves (AUC) and compared with the Delong test. Other discriminative indices, including sensitivity, specificity and overall accuracy were also calculated. Besides, to correct for optimisms in model performance, internal validation was conducted by using bootstrap resampling methods with 1,000 replicates. Additional subgroup analyses were performed to assess whether the predictive value of the proposed system was consistent in the prespecified subgroups stratified by the baseline main tumor size (≥10cm vs. <10cm), tumor number (single vs. multiple), presence of macrovascular invasion, BCLC stage (B or C vs. A), type of TACE (conventional vs. drug-eluting beads), times of TACE, and use of ICIs.

**5. Consistency between RECIST 1.1 and mRECIST, and interobserver agreement.**

**Table S4.** Consistency between response categories according to RECIST 1.1 and mRECIST.

| **Radiologic criteria** | **Total (%)** | **RECIST 1.1** | | | |  |
| --- | --- | --- | --- | --- | --- | --- |
| CR | PR | SD | PD | *p value |
| **mRECIST** | 112 | 0 (0) | 35 (31.3) | 67 (59.8) | 10 (8.9) |  |
| CR | 24 (21.4) | 0 (0) | 12 (10.8) | 12 (10.8) | 0 (0) | <0.001 |
| PR | 66 (58.9) | 0 (0) | 23 (20.5) | 43 (38.4) | 0 (0) |
| SD | 10 (8.9) | 0 (0) | 0 (0) | 10 (8.9) | 0 (0) |
| PD | 12 (10.8) | 0 (0) | 0 (0) | 2 (1.8) | 10 (8.9) |

CR complete response, PR partial response, SD stable disease, PD progressive disease.

*P value was calculated using Fisher’s exact test.

**Table S5.** Interobserver agreement on the response categories and size of target lesions according to RECIST 1.1 and mRECIST.

| **Radiologic parameter** | **RECIST 1.1** | | **mRECIST** | |
| --- | --- | --- | --- | --- |
| **Reviewer 1** | **Reviewer 2** | **Reviewer 1** | **Reviewer 2** |
| #CR | 0 (0) | 0 (0) | 24 (21.4) | 21 (18.8) |
| #PR | 33 (29.5) | 37 (33.0) | 63 (56.3) | 67 (59.8) |
| #SD | 70 (62.5) | 70 (62.5) | 11 (9.8) | 17 (15.2) |
| #PD | 9 (8.0) | 5 (4.5) | 14 (12.5) | 7 (6.2) |
| Weighted *κ* (95%CI, p value) | 0.64 (0.51-0.78, p<0.001) | | 0.50 (0.35-0.65, p<0.001) | |
| *SLD at baseline (cm) | 9.2 (4.3) | 9.4 (4.4) | 9 (4.2) | 9.3 (4.4) |
| ICC (95%CI) | 0.91 (0.86-0.93) | | 0.90 (0.85-0.93) | |
| *SLD at follow-up (cm) | 7.6 (3.7) | 7.3 (3.7) | 3.7 (3.3) | 3.3 (3.0) |
| ICC (95%CI) | 0.88 (0.83-0.92) | | 0.71 (0.61-0.79) | |
| *Change of SLD (%) | -10.9 (49.6) | -17.5 (33) | -45.5 (66.7) | -54.8 (45.1) |
| ICC (95%CI) | 0.46 (0.30-0.59) | | 0.52 (0.38-0.65) | |

CR complete response, PR partial response, SD stable disease, PD progressive disease, SLD sum of the longest diameter, ICC interclass correlation coefficient.

#Data were presented as number (percentage).

*Data were presented as mean (standard deviation)

**6. Predictors of recurrence-free survival and overall survival after liver resection.**

**Table S6.** Univariable and multivariable Cox regression analyses for predictors of recurrence-free survival after liver resection.

|  | Univariable Cox analysis | |  | Multivariable Cox analysis | |
| --- | --- | --- | --- | --- | --- |
| Variables | **HR (95%CI)** | ***P* value** |  | **HR (95%CI)** | ***P* value** |
| Age (per year) | 0.99 (0.96-1.01) | 0.252 |  | … | … |
| BCLC (stage B/C vs. A) | 1.73 (0.95-3.14) | 0.071 |  | … | … |
| Tumor number (single vs. multiple) | 0.93 (0.51-1.71) | 0.826 |  | … | … |
| Macrovascular invasion (Yes vs. no) | 2.04 (1.15-3.61) | 0.015 |  | 1.87 (1.01-3.46) | 0.045 |
| Distant metastasis (Yes vs. no) | 1.76 (0.63-4.94) | 0.281 |  | … | … |
| Major pathologic response (Yes vs. no) | 0.47 (0.26-0.87) | 0.016 |  | 0.35 (0.17-0.73) | 0.005 |
| R0 resection (No vs. yes) | 10.86 (2.43-48.46) | 0.002 |  | 13.60 (2.73-67.45) | 0.001 |
| Capsule involvement (Yes vs. no) | 2.89 (1.51-5.55) | 0.002 |  | … | … |
| Satellite nodule (Yes vs. no) | 3.63 (1.58-8.36) | 0.002 |  | … | … |
| Microvascular invasion (Yes vs. no) | 2.37 (1.23-4.55) | 0.010 |  | … | … |
| Tumor differentiation  (poorly vs. well/moderately differentiated) | 1.86 (0.86-4.03) | 0.117 |  | … | … |
| Main tumor size at baseline  (≤5cm vs. >5cm) | 0.78 (0.50-1.21) | 0.266 |  | … | … |
| Main tumor size before surgery  (≤5cm vs. >5cm) | 0.89 (0.59-1.35) | 0.598 |  | … | … |
| AFP at baseline (>100 vs. ≤100ng/ml) | 1.32 (0.74-2.36) | 0.343 |  | … | … |
| AFP before surgery (>100 vs. ≤100ng/ml) | 2.20 (1.21-4.01) | 0.010 |  | … | … |
| AFP at baseline (>200 vs. ≤200ng/ml) | 1.32 (0.74-2.36) | 0.352 |  | … | … |
| AFP before surgery (>200 vs. ≤200ng/ml) | 1.85 (0.99-3.46) | 0.055 |  | … | … |
| AFP at baseline (>400 vs. ≤400ng/ml) | 1.40 (0.78-2.52) | 0.264 |  | … | … |
| AFP before surgery (>400 vs. ≤400ng/ml) | 2.01 (1.02-3.96) | 0.045 |  | … | … |
| PIVKA-Ⅱ at baseline  (>100 vs. ≤100ng/ml) | 0.69 (0.34-1.39) | 0.301 |  | … | … |
| PIVKA-Ⅱ before surgery  (>100 vs. ≤200ng/ml) | 1.41 (0.79-2.49) | 0.244 |  | … | … |

**Figure S1.** Kaplan-Meier estimates of overall survival after resection stratified based on **(A)** major pathologic response, **(B)** pathologic complete response, **(C)** radiologic complete response based on mRECIST, **(D)** objective response based on mRECIST, and **(E)** objective response based on RECIST 1.1. HR hazard ratio.

**
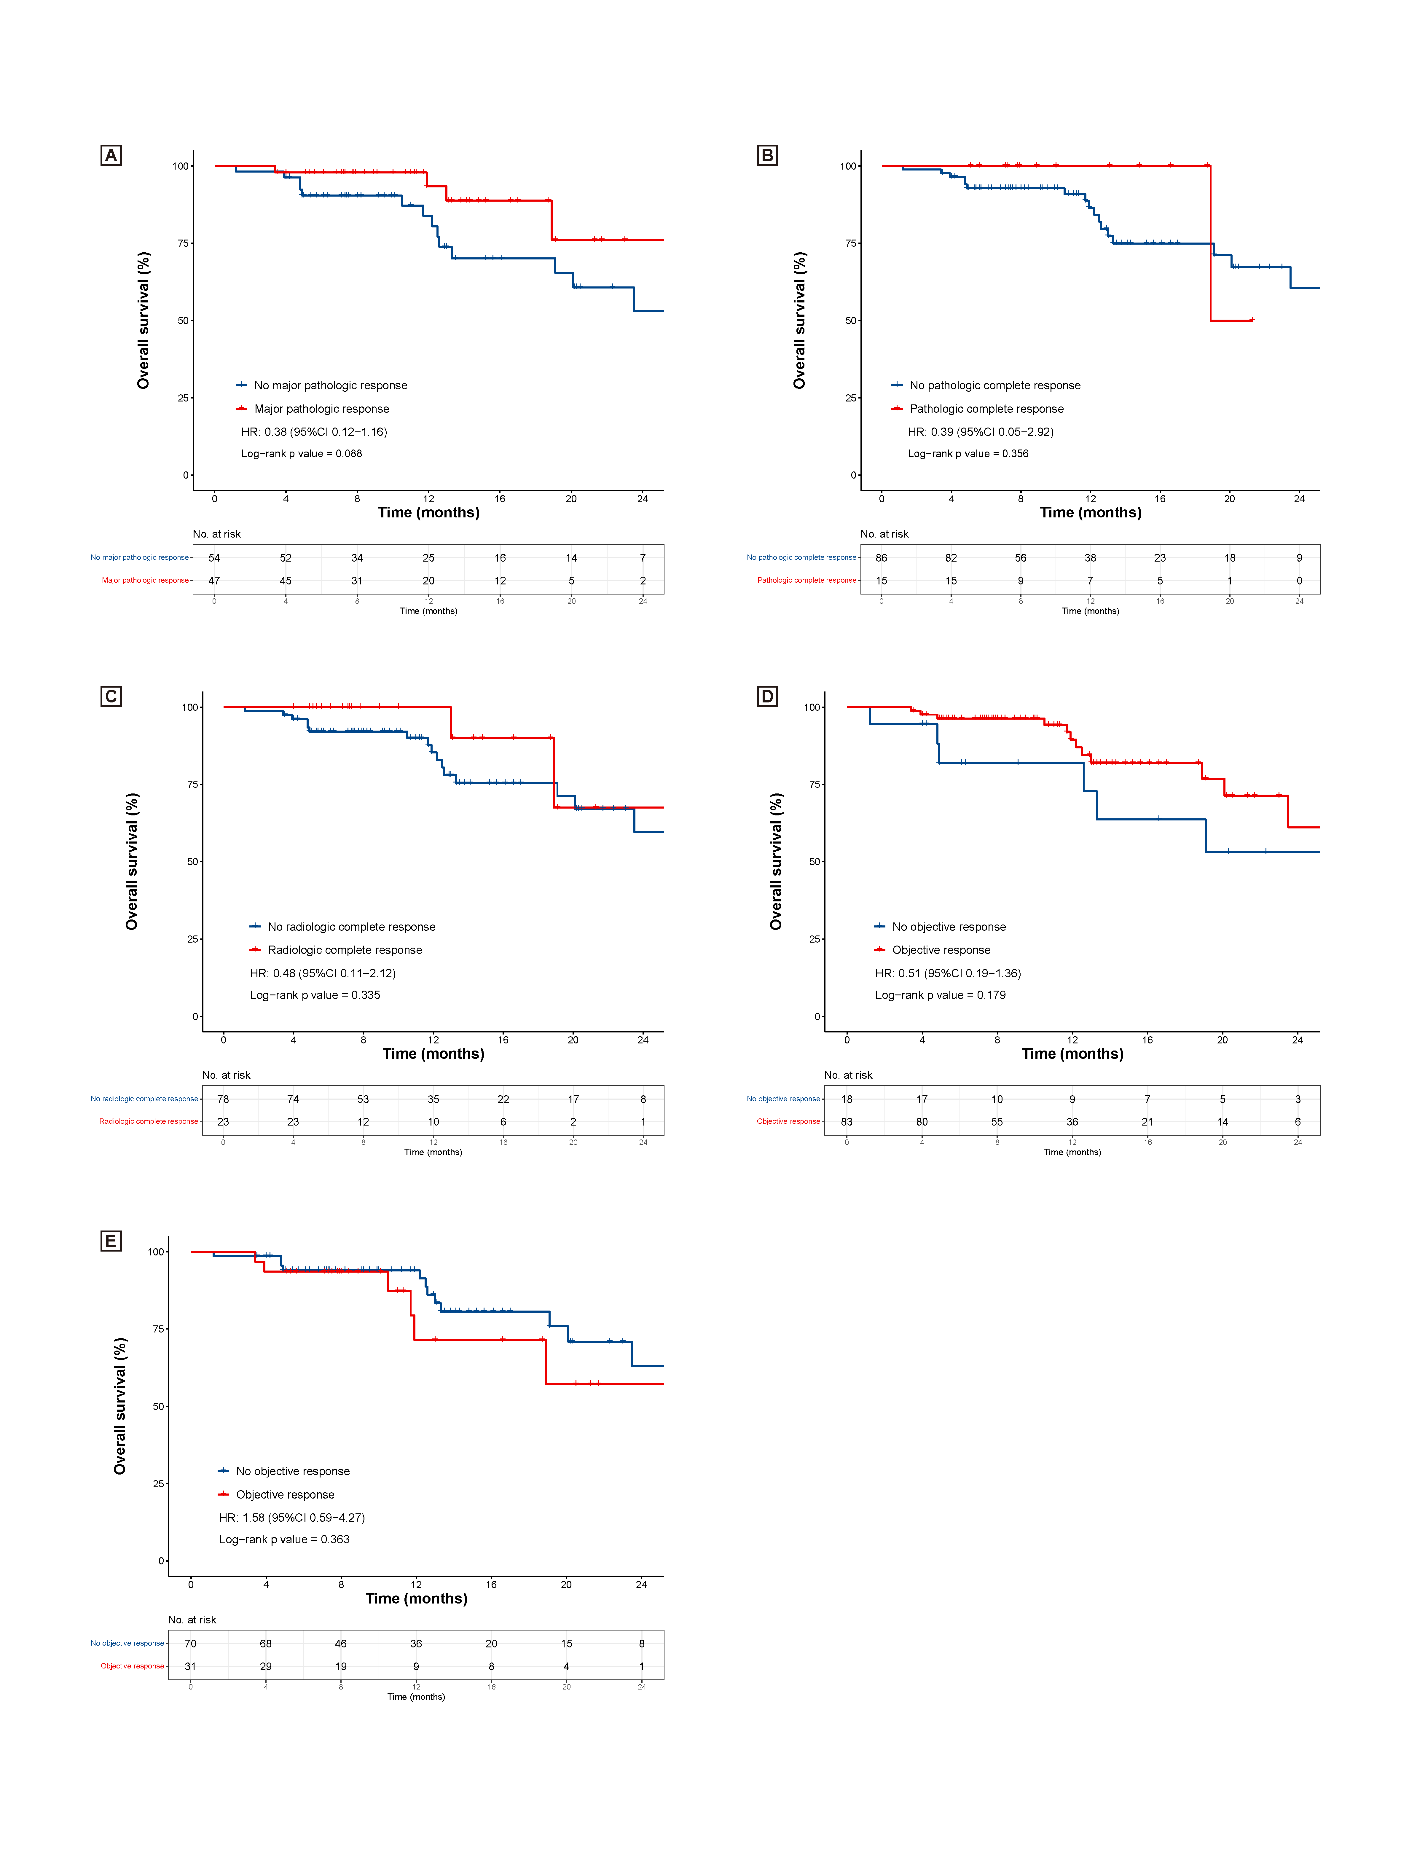
**

**7. The prediction system for major pathologic response.**

***7.1 Rational for predicting major pathologic response***

As demonstrated in the univariable and multivariable Cox regression analyses, MPR (instead of pCR) was the independent predictor of recurrence-free survival (RFS) after liver resection. The non-significance of pCR was partially attributed to its low incidence (15 patients, 14.8%). Additionally, post-resection RFS was identical for patients with MPR and with pCR (median RFS: 18.9 months for both groups). Given the comparable prognostic value between MPR and pCR, and a markedly larger proportion of patients captured by the former (46.5% vs. 14.8%, p<0.001), MPR may increase the proportion of patients that will benefit from subsequent liver resection or transplantation compared with pCR, thus has the potential to be used as a reliable surrogate of treatment efficacy and an indicator of prognosis.

Several potential mechanisms may explain the prognostic value of MPR. On the one hand, combination of LRT and systemic therapy could result in substantially decreased tumor burden and provided the opportunity for subsequent curative-intent treatment, which might counterbalance the advantage of pCR on prognosis. On the other hand, the clinical benefit of ICIs was mainly derived from priming antitumor immune responses that systemically eradicate microscopic tumor deposits and decrease the recurrence risk. Consequently, patients may not need pCR of tumor burden to experience clinical benefit especially when definitive curative-intent treatment has been scheduled.

***7.2 Development of a prediction system for MPR***

Among radiologic and laboratory parameters, only mRECIST, AFP and PIVKA-Ⅱ changes were correlated with MPR (Spearman r >0.5). Therefore, the above variables were integrated to develop a non-invasive prediction system for MPR. Considering the relatively high proportion of AFP-negative patients (33.0%, defined as serum levels of AFP ≤20 ng/ml both at baseline and during follow-up), we divided the entire cohort into an AFP-positive (n=75) and an AFP-negative group (n=37), aiming to develop two prediction models respectively. Noteworthily, in the AFP-negative group, one patient had simultaneously PIVKA-Ⅱ levels ≤40 ng/ml both at baseline and during follow-up. Based on the maximal Youden index, the optimal cutoff values for predicting MPR were a 67% decrease of SLD of viable target lesions and an 83% decrease of baseline PIVKA-Ⅱ level (determined in the entire cohort), and a 92% decrease of baseline AFP level (determined in the AFP-positive group). To facilitate clinical use, a cutoff value of a 70% decrease of SLD of viable target lesions (termed as “mRECIST response”), a 90% decrease of AFP (termed as “AFP response”), and an 80% decrease of PIVKA-Ⅱ (termed as “PIVKA-Ⅱ response”) was applied.

Multivariable Logistic analyses showed that mRECIST response (OR 22.68, 95%CI 5.91-118.42, p<0.001) and AFP response (OR 21.36, 95%CI 4.67-142.74, p<0.001) were independently associated with MPR in the AFP-positive group, and mRECIST response (OR 14.59, 95%CI 2.50-188.77, p<0.001) and PIVKA-Ⅱ response (OR 11.24, 95%CI 1.74-119.04, p<0.001) were independently associated with MPR in the AFP-negative group. Thus, the combination of mRECIST and AFP responses was used in the AFP-positive group, and the combination of mRECIST and PIVKA-Ⅱ responses was used in the AFP-negative group. Additionally, given the similar coefficients (AFP-positive group: 3.12 for mRECIST response and 3.06 for AFP response; AFP-negative group: 2.68 for mRECIST response and 2.42 for PIVKA-Ⅱ response), we used the same coefficient weights in each combination:

AFP-positive group: *1*mRECIST response (0-absence, 1-presence) + 1*AFP response (0-absence, 1-presence)*;

AFP-negative group: *1*mRECIST response (0-absence, 1-presence) + 1* PIVKA-Ⅱ response (0-absence, 1-presence)*;

Therefore, the AFP-positive group could be classified into three categories, in which patients who achieved both mRECIST and AFP responses (dual-positive response) had significantly higher probability of MPR (90.0% vs. 0%, p<0.001) than patients who met none of the criteria (dual-negative response). This increased probability translated into significantly better post-resection RFS (median RFS: not reached (NR) vs. 7.1 months; HR 0.41, 95%CI 0.17-0.97, p=0.043). The dual-biomarker model achieved an AUC of 0.905 (95%CI 0.845-0.966) in the AFP-positive group, with a sensitivity of 0.771 (0.601-0.896) and a specificity of 0.925 (0.796-0.984), demonstrating superiority than single predictors. Similarly, in the AFP-negative group, patients with both mRECIST and PIVKA-Ⅱ responses (dual-positive response) had significantly higher probability of MPR (81.8% vs. 0%, p<0.001) and marginally better RFS (median RFS: NR vs. 13.3 months; HR 0.27, 95%CI 0.06-1.28, p=0.099) compared with those with dual-negative response. The dual-biomarker model achieved an AUC of 0.887 (95%CI 0.792-0.982) in the AFP-negative group, with a sensitivity of 0.643 (0.351-0.872) and a specificity of 0.913 (0.720-0.989).

We performed additional analysis to justify the rationality for development of the prediction system. First, PIVKA-Ⅱ response was integrated into the mRECIST-AFP response model in the AFP-positive group, and the new model achieved a slightly lower AUC of 0.885 (95%CI 0.806-0.964). Furthermore, PIVKA-Ⅱ response was used as a surrogate of AFP response to combine with mRECIST response in the AFP-positive group. This new combination achieved a markedly lower AUC (0.825, 95%CI 0.731-0.919). These results confirmed the reliability of the proposed prediction system.

**8. Prognosis stratification ability of the prediction system.**

**Figure S2.** Kaplan-Meier estimates of recurrence-free survival after resection stratified according to different categories of the prediction system in the **(A)** AFP-positive group and **(B)** AFP-negative group.

**
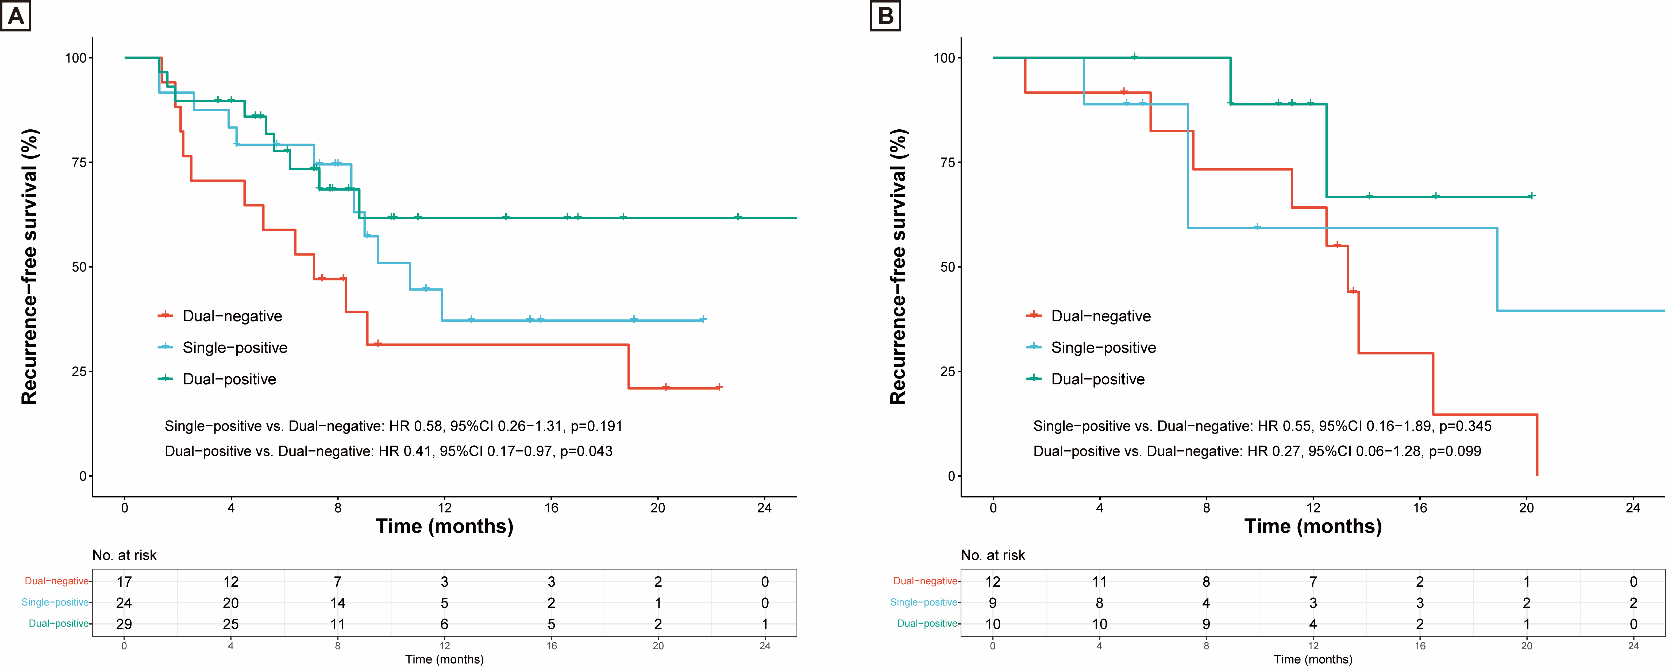
**

**
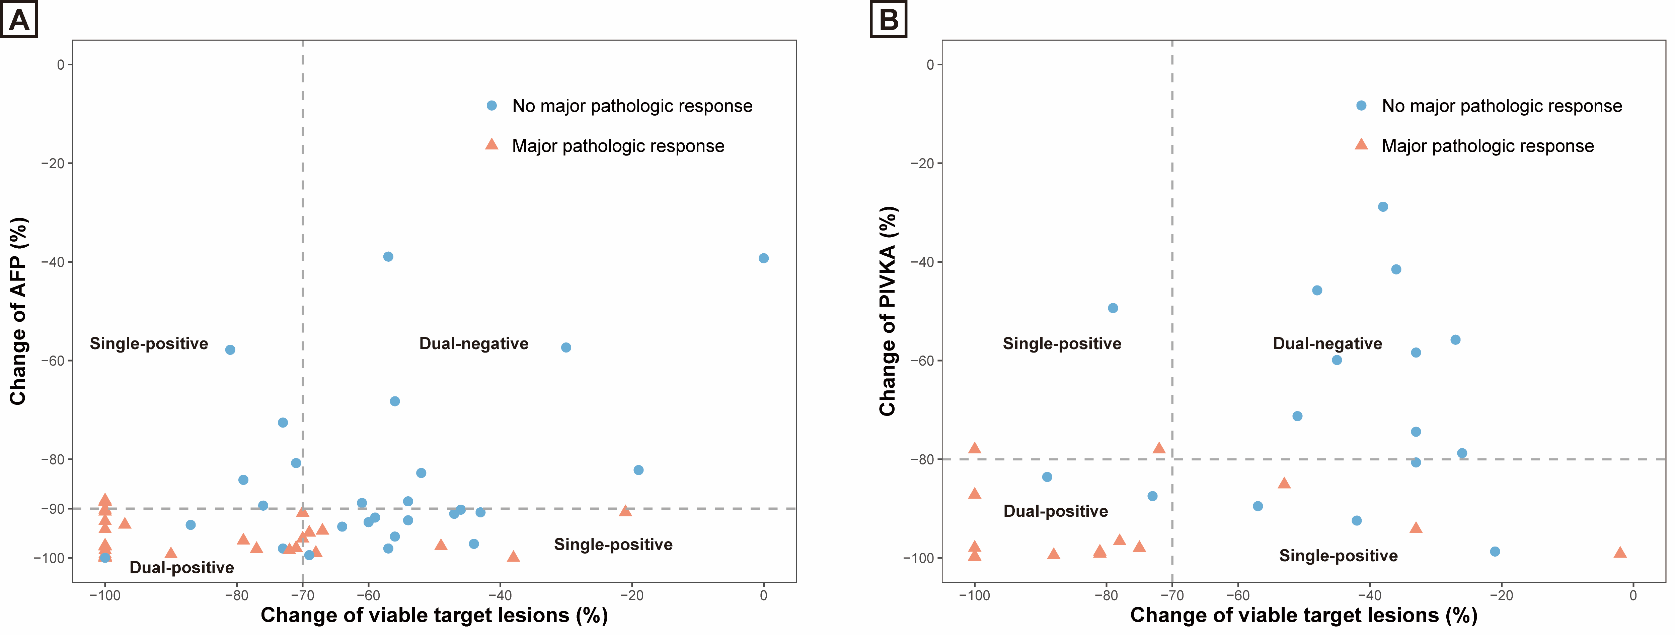
Figure S3.** Relationship between change of viable target lesions (mRECIST) and **(A)** change of AFP and **(B)** change of PIVKA-Ⅱ stratified by major pathologic response.

**Table S7.** Post-resection recurrence-free survival in AFP-positive patients stratified by different response criteria.

|  | Number of patients (%) | Median RFS  (95%CI) | 6-month RFS rate  (95%CI) | 12-month RFS rate (95%CI) | P value |
| --- | --- | --- | --- | --- | --- |
| All AFP-positive patients | 70 | 9.5 (8.5-NA) | 73.6 (63.9-84.9) | 43.7 (31.6-60.4) |  |
| mRECIST response |  |  |  |  |  |
| Non-responders | 34 (48.6) | 8.6 (7.1-NA) | 70.4 (56.5-87.6) | 36.0 (21.7-59.8) | 0.267 |
| Responders | 36 (51.4) | 18.9 (8.8-NA) | 76.7 (63.8-92.3) | 52.3 (35.0-78.2) |  |
| AFP response |  |  |  |  |  |
| Non-responders | 24 (34.3) | 9.5 (7.1-NA) | 70.8 (54.8-91.6) | 40.5 (23.8-68.9) | 0.648 |
| Responders | 46 (65.7) | 10.7 (8.5-NA) | 75.1 (63.3-89.1) | 46.8 (32.0-68.6) |  |
| Dual-biomarker model |  |  |  |  |  |
| Non-responders | 16 (22.9) | 7.1 (4.5-NA) | 58.8 (39.5-87.6) | 31.4 (14.7-66.9) |  |
| Single-positive responders | 25 (35.7) | 10.7 (8.6-NA) | 79.2 (64.5-97.2) | 37.1 (19.8-69.6) | 0.110 |
| Dual-positive responders | 29 (41.4) | NA (9.1-NA) | 77.7 (63.4-95.3) | 61.7 (43.9-86.6) |  |

**Table S8.** Post-resection recurrence-free survival in AFP-negative patients stratified by different response criteria.

|  | Number of patients (%) | Median RFS  (95%CI) | 6-month RFS rate  (95%CI) | 12-month RFS rate (95%CI) | P value |
| --- | --- | --- | --- | --- | --- |
| All AFP-negative patients | 31 | 13.7 (12.5-NA) | 89.8 (79.5-100) | 70.4 (55.0-90.2) |  |
| mRECIST response |  |  |  |  |  |
| Non-responders | 18 (58.1) | 12.5 (7.5-NA) | 82.5 (66.3-100) | 56.4 (36.5-87.2) | 0.046 |
| Responders | 13 (41.9) | NA (18.9-NA) | 90.9 (75.4-100) | 75.8 (50.6-100) |  |
| PIVKA-Ⅱ response |  |  |  |  |  |
| Non-responders | 15 (48.4) | 13.7 (11.2-NA) | 92.3 (78.9-100) | 69.2 (48.2-99.5) | 0.404 |
| Responders | 16 (51.6) | NA (12.5-NA) | 87.5 (72.7-100) | 72.9 (53.3-99.8) |  |
| Dual-biomarker model |  |  |  |  |  |
| Non-responders | 12 (38.7) | 13.3 (11.2-NA) | 82.5 (63.1-100) | 64.2 (41.3-99.6) |  |
| Single-positive responders | 9 (29.0) | 18.9 (7.3-NA) | 88.9 (70.6-100) | 59.3 (32.2-100) | 0.180 |
| Dual-positive responders | 10 (32.3) | NA (14.5-NA) | 100 (100-100) | 88.9 (70.6-100) |  |

**9. Subgroup analyses.**

**Figure S4.** Predictive accuracy of the prediction system (mRECIST-AFP response) in prespecified subgroups in the AFP-positive group.

C-TACE common TACE, DEB-TACE drug-eluting beads TACE, AUC area under the receiver operating characteristic curves.

**

**

**Reference for supplementary materials**

1. EASL Clinical Practice Guidelines: Management of hepatocellular carcinoma. J Hepatol 2018;69:182-236.

2. Heimbach JK, Kulik LM, Finn RS, et al. AASLD guidelines for the treatment of hepatocellular carcinoma. Hepatology 2018;67:358-380.

3. Vogel A, Cervantes A, Chau I, et al. Hepatocellular carcinoma: ESMO Clinical Practice Guidelines for diagnosis, treatment and follow-up. Ann Oncol 2018;29:iv238-iv255.

4. Kudo M, Finn RS, Qin S, et al. Lenvatinib versus sorafenib in first-line treatment of patients with unresectable hepatocellular carcinoma: a randomised phase 3 non-inferiority trial. Lancet 2018;391:1163-1173.

5. Finn RS, Ikeda M, Zhu AX, et al. Phase Ib Study of Lenvatinib Plus Pembrolizumab in Patients With Unresectable Hepatocellular Carcinoma. J Clin Oncol 2020;38:2960-2970.

6. Huang C, Zhu XD, Shen YH, et al. Organ specific responses to first-line lenvatinib plus anti-PD-1 antibodies in patients with unresectable hepatocellular carcinoma: a retrospective analysis. Biomark Res 2021;9:19.

7. Zhu XD, Huang C, Shen YH, et al. Downstaging and Resection of Initially Unresectable Hepatocellular Carcinoma with Tyrosine Kinase Inhibitor and Anti-PD-1 Antibody Combinations. Liver Cancer 2021;10:320-329.

8. Chen K, Wei W, Liu L, et al. Lenvatinib with or without immune checkpoint inhibitors for patients with unresectable hepatocellular carcinoma in real-world clinical practice. Cancer Immunol Immunother 2022;71:1063-1074.

9. Zhang J, Zhang X, Mu H, et al. Surgical Conversion for Initially Unresectable Locally Advanced Hepatocellular Carcinoma Using a Triple Combination of Angiogenesis Inhibitors, Anti-PD-1 Antibodies, and Hepatic Arterial Infusion Chemotherapy: A Retrospective Study. Front Oncol 2021;11:729764.

10. Lai Z, He M, Bu X, et al. Lenvatinib, toripalimab plus hepatic arterial infusion chemotherapy in patients with high-risk advanced hepatocellular carcinoma: A biomolecular exploratory, phase II trial. Eur J Cancer 2022;174:68-77.

11. Pan X, Wu SJ, Tang Y, et al. Safety and Efficacy of Transarterial Chemoembolization Combined with Tyrosine Kinase Inhibitor and Immune Checkpoint Inhibitors for Unresectable Hepatocellular Carcinoma: A Single Center Experience. J Hepatocell Carcinoma 2023;10:883-892.

12. Kudo M, Ueshima K, Saeki I, et al. A Phase 2, Prospective, Multicenter, Single-Arm Trial of Transarterial Chemoembolization Therapy in Combination Strategy with Lenvatinib in Patients with Unresectable Intermediate-Stage Hepatocellular Carcinoma: TACTICS-L Trial. Liver Cancer 2023:1-14.

13. Peng W, Zhang X, Li C, et al. Programmed cell death protein 1 and tyrosine kinase inhibition plus transcatheter arterial chemoembolization of advanced hepatocellular carcinoma. Br J Surg 2023;110:746-748.

14. Wu JY, Zhang ZB, Zhou JY, et al. Outcomes of Salvage Surgery for Initially Unresectable Hepatocellular Carcinoma Converted by Transcatheter Arterial Chemoembolization Combined with Lenvatinib plus Anti-PD-1 Antibodies: A Multicenter Retrospective Study. Liver Cancer 2023;12:229-237.

15. Yuan Y, He W, Yang Z, et al. TACE-HAIC combined with targeted therapy and immunotherapy versus TACE alone for hepatocellular carcinoma with portal vein tumour thrombus: a propensity score matching study. Int J Surg 2023;109:1222-1230.

16. Zhu HD, Li HL, Huang MS, et al. Transarterial chemoembolization with PD-(L)1 inhibitors plus molecular targeted therapies for hepatocellular carcinoma (CHANCE001). Signal Transduct Target Ther 2023;8:58.
